# Supplementary material for: From experimental data to thermophysical insight: characterizing choline-based ionic liquids using advanced data analysis
Source: Royal Society of Chemistry journal article supplement (doi:10.1039/d5ra07884a), 2026-01-01
Supplement: d5ra07884a2.xlsx [file d5ra07884a2.xlsx]

## Sheet: TableSI_1
Table SI-1. Density of choline lactate as a function of temperature and water content
MH2O (g/mol)		18.015		outlier: w_H2O=0.045		outliers marked in red colour
MIL (g/mol)		193.24
W_H2O	0	0.02012	0.045	0.10604	0.14444	0.18635	0.24517	1
x_H2O	0	0.180496	0.335744	0.559931	0.644245	0.710708	0.776986	1
x_IL	1	0.819504	0.664256	0.440069	0.355755	0.289292	0.223014	0
M_avg (g/mol)	193.24	161.613	134.409	95.126	80.3522	68.7062	57.0926	18.015
T/K	𝞀/g/cm3
	value extrapolated to zero water content							literature values a
287.15	1.1594	1.1568	1.12922	1.15219	1.14308	1.13954	1.13427	0.99925
289.15	1.1581	1.15551	1.12799	1.15087	1.14173	1.13818	1.13292	0.99895
291.15	1.1568	1.1542	1.12676	1.14955	1.14039	1.13682	1.13157	0.9986
293.15	1.1555	1.15291	1.12552	1.14823	1.13904	1.13546	1.13022	0.99821
295.15	1.1542	1.15162	1.12429	1.14691	1.1377	1.13411	1.12888	0.99777
297.15	1.1529	1.15033	1.12306	1.14558	1.13635	1.13275	1.12754	0.9973
299.15	1.1516	1.14904	1.12183	1.14426	1.135	1.1314	1.1262	0.99679
301.15	1.1503	1.14776	1.1206	1.14293	1.13366	1.13006	1.12486	0.99624
303.15	1.149	1.14648	1.11937	1.14161	1.13232	1.12872	1.12352	0.99565
305.15	1.1478	1.1452	1.11814	1.14028	1.13098	1.12738	1.12219	0.99503
307.15	1.1465	1.14392	1.11691	1.13896	1.12963	1.12604	1.12086	0.99437
309.15	1.1452	1.14264	1.11568	1.13763	1.1283	1.1247	1.11952	0.99368
311.15	1.1439	1.14136	1.11444	1.1363	1.12696	1.12337	1.11819	0.99297
313.15	1.1426	1.14006	1.11321	1.13495	1.12561	1.12204	1.11687	0.99222
a source: https://webbook.nist.gov/cgi/fluid.cgi?P=0.1&TLow=287.15&THigh=313.15&TInc=2&Digits=5&ID=C7732185&Action=Load&Type=IsoBar&TUnit=K&PUnit=MPa&DUnit=g%2Fml&HUnit=kJ%2Fmol&WUnit=m%2Fs&VisUnit=uPa*s&STUnit=N%2Fm&RefState=DEF

## Sheet: Table SI_2
Table SI-2. Density of choline levulinate as a function of temperature and water content
MH2O (g/mol)		18.015	outliers w_H2O=0.18, 0.03		outliers marked in red colour
MIL (g/mol)		219.28
W_H2O	0	0.13	0.18	0.03	0.045	0.0807	0.013	0.062	0.22	1
x_H2O	0	0.645241	0.727663	0.273497	0.364496	0.516562	0.13817	0.445846	0.774427	1
x_IL	1	0.354759	0.272337	0.726503	0.635504	0.483438	0.86183	0.554154	0.225573	0
M_avg (g/mol)	219.28	89.4155	72.8269	164.235	145.92	115.314	191.471	129.547	63.415	18.015
T/K	𝞀/g/cm3
	value extrapolated to zero water content									literature values a
287.15	1.1311	1.12854	1.12228	1.1322	1.12922	1.13091	1.13082	1.13057	1.12922	0.99925
289.15	1.1298	1.12727	1.12101	1.13095	1.12799	1.12966	1.12957	1.12931	1.12799	0.99895
291.15	1.1286	1.126	1.11974	1.12971	1.12676	1.12841	1.12833	1.12805	1.12676	0.9986
293.15	1.1273	1.12473	1.11846	1.12847	1.12552	1.12717	1.12708	1.12679	1.12552	0.99821
295.15	1.1261	1.12346	1.11719	1.12723	1.12429	1.12593	1.12585	1.12553	1.12429	0.99777
297.15	1.1248	1.12218	1.11592	1.126	1.12306	1.12469	1.12461	1.12426	1.12306	0.9973
299.15	1.1235	1.12091	1.11465	1.12476	1.12183	1.12345	1.12337	1.12299	1.12183	0.99679
301.15	1.1223	1.11962	1.11338	1.12353	1.1206	1.12222	1.12214	1.12172	1.1206	0.99624
303.15	1.121	1.11835	1.11211	1.1223	1.11937	1.12099	1.12091	1.12044	1.11937	0.99565
305.15	1.1198	1.11708	1.11085	1.12106	1.11814	1.11976	1.11967	1.11916	1.11814	0.99503
307.15	1.1185	1.1158	1.10959	1.11983	1.11691	1.11853	1.11844	1.11786	1.11691	0.99437
309.15	1.1172	1.11452	1.10832	1.1186	1.11568	1.11729	1.11722	1.11652	1.11568	0.99368
311.15	1.116	1.11324	1.10706	1.11736	1.11444	1.11606	1.11599	1.11517	1.11444	0.99297
313.15	1.1146	1.11196	1.1058	1.11612	1.11321	1.11482	1.11476	1.11377	1.11321	0.99222
a source: https://webbook.nist.gov/cgi/fluid.cgi?P=0.1&TLow=287.15&THigh=313.15&TInc=2&Digits=5&ID=C7732185&Action=Load&Type=IsoBar&TUnit=K&PUnit=MPa&DUnit=g%2Fml&HUnit=kJ%2Fmol&WUnit=m%2Fs&VisUnit=uPa*s&STUnit=N%2Fm&RefState=DEF

## Sheet: TableSI_3
Table SI-3. Isobaric molar heat capacity of choline lactate as a function of temperature and water content
MH2O (g/mol)		18.015		outlier: w_H2O=0.14		outliers marked in red colour
MIL (g/mol)		193.24
W_H2O	0	0.00841	0.02012	0.08	0.10604	0.14	0.18635	0.24517	1
x_H2O	0	0.0833895	0.180496	0.482602	0.559931	0.63586	0.710708	0.776986	1
x_IL	1	0.91661	0.819504	0.517398	0.440069	0.36414	0.289292	0.223014	0
M_avg (g/mol)	193.24	178.628	161.613	108.676	95.126	81.8215	68.7062	57.0926	18.015
T/K	Cpm / J/(K mol)
	value extrapolated to zero water content								literature values a
283.15
284.15
285.15	407.079	378.542	346.77	243.707	217.582	194.859	168.831	140.293	75.6449
286.15	407.485	378.941	347.062	243.926	217.839	195.07	169.072	140.493	75.617
287.15	407.736	379.158	347.377	244.155	218.055	195.316	169.273	140.66	75.5904
288.15	408.065	379.476	347.637	244.359	218.291	195.501	169.501	140.85	75.5651
289.15	408.355	379.765	347.991	244.624	218.548	195.748	169.72	141.031	75.541
290.15	408.78	380.136	348.274	244.849	218.762	195.951	169.926	141.203	75.5181
291.15	409.108	380.439	348.545	245.048	219.001	196.161	170.152	141.391	75.4963
292.15	409.418	380.716	348.869	245.297	219.238	196.35	170.282	141.499	75.4758
293.15	409.727	381.017	349.141	245.518	219.478	196.577	170.508	141.686	75.4563
294.15	410.21	381.453	349.568	245.765	219.766	196.84	170.765	141.9	75.438
295.15	410.422	381.653	349.764	245.969	219.939	197.021	170.965	142.067	75.4207
296.15	410.732	381.956	350.056	246.162	220.188	197.244	171.157	142.226	75.4044
297.15	411.06	382.256	350.359	246.369	220.419	197.456	171.367	142.4	75.3892
298.15	411.408	382.6	350.599	246.6	220.649	197.672	171.585	142.581	75.3749
299.15	411.717	382.9	350.947	246.849	220.905	197.908	171.784	142.747	75.3616
300.15	412.007	383.161	351.233	247.057	221.135	198.088	172.001	142.927	75.3493
301.15	412.336	383.484	351.527	247.287	221.376	198.294	172.177	143.076	75.3378
302.15	412.645	383.781	351.825	247.45	221.614	198.484	172.368	143.232	75.3273
303.15	412.973	384.061	352.121	247.68	221.81	198.642	172.567	143.398	75.3176
a isobaric molar heat capacity obtained from Shomate equation, Chase, M.W., Jr., NIST-JANAF Themochemical Tables, Fourth Edition, J. Phys. Chem. Ref. Data, Monograph 9, 1998, 1-1951.

## Sheet: Table SI_4
Table SI-4. Isobaric molar heat capacity of choline levulinate as a function of temperature and water content
MH2O (g/mol)		18.015		outliers: w(H2O)=0.01257 , 0.0619, 0.12				outliers marked in red colour
MIL (g/mol)		219.28
W_H2O	0	0.00807	0.0125	0.025	0.06188	0.12	0.14	0.183695	0.22	1
x_H2O	0	0.0901049	0.199956	0.237866	0.445335	0.624036	0.664598	0.732557	0.774427	1
x_IL	1	0.909895	0.800044	0.762134	0.554665	0.375964	0.335402	0.267443	0.225573	0
M_avg (g/mol)	219.28	201.145	179.036	171.406	129.65	93.6834	85.5196	71.842	63.415	18.015
T/K	Cpm / J/(K mol)
	value extrapolated to zero water content									literature values a
283.15	441.52	408.033	392.64	354.454	276.799	211.362	195.848	169.456	153.543	75.7048
284.15	442.858	409.49	393.603	355.289	277.563	212.011	196.304	170.033	154.028	75.6742
285.15	443.231	409.935	393.927	355.562	278.004	212.355	196.577	170.327	154.252	75.6449
286.15	443.603	410.329	394.251	355.902	278.414	212.688	196.895	170.632	154.577	75.617
287.15	444.02	410.796	394.624	356.303	278.816	212.96	197.216	170.892	154.838	75.5904
288.15	444.656	411.345	395.087	356.757	279.187	213.308	197.435	171.182	155.159	75.5651
289.15	445.051	411.808	394.583	357.211	279.527	213.629	197.826	171.447	155.368	75.541
290.15	445.533	412.157	396.097	357.733	279.751	213.991	198.151	171.763	155.58	75.5181
291.15	444.656	412.824	396.544	358.174	280.301	214.241	198.377	172.054	155.74	75.4963
292.15	446.125	413.3	397.042	358.565	280.637	214.549	198.741	172.361	156.081	75.4758
293.15	446.63	413.677	397.431	359.01	281.073	214.87	198.981	172.701	156.336	75.4563
294.15	447.55	414.241	397.805	359.404	281.362	215.182	199.263	172.951	156.583	75.438
295.15	447.879	414.589	398.092	359.805	281.712	215.517	199.553	173.258	156.806	75.4207
296.15	448.296	415.134	398.521	360.133	281.961	215.866	200.965	173.559	157.021	75.4044
297.15	448.625	415.565	398.812	360.459	282.262	216.139	200.088	173.779	157.267	75.3892
298.15	449.02	415.988	399.094	360.854	282.602	216.464	200.361	174.111	157.501	75.3749
299.15	449.436	416.336	399.522	361.245	282.891	216.733	200.647	174.361	157.714	75.3616
300.15	449.721	416.923	399.941	361.591	283.235	217.057	200.986	174.64	157.965	75.3493
301.15	450.27	417.263	400.262	362.087	283.531	217.342	202.73	174.883	158.172	75.3378
302.15	450.467	417.717	400.822	362.443	283.898	217.61	201.583	175.137	158.466	75.3273
303.15	451.015	418.117	401.134	362.939	284.178	217.891	201.883	175.348	158.655	75.3176
a isobaric molar heat capacity obtained from Shomate equation, Chase, M.W., Jr., NIST-JANAF Themochemical Tables, Fourth Edition, J. Phys. Chem. Ref. Data, Monograph 9, 1998, 1-1951.

## Sheet: Table SI_5
Table SI-5. Isobaric molar heat capacity of chol-C11 lactate as a function of temperature and water content
MH2O (g/mol)		18.015	outlier: w_H2O=0.0219			outliers marked in red colour
MIL (g/mol)		359.51
W_H2O	0	0.0106	0.0219	0.0539	0.071678	0.10741	0.125	0.1575	0.1867	0.2019	1
x_H2O	0	0.176142	0.308831	0.532036	0.606433	0.706006	0.740319	0.788614	0.820824	0.834668	1
x_IL	1	0.823858	0.691169	0.467964	0.393567	0.293994	0.259681	0.211386	0.179176	0.165332	0
M_avg (g/mol)	359.51	299.358	254.046	177.822	152.416	118.413	106.695	90.2024	79.2027	74.4752	18.015
T/K	Cpm / J/(K mol)
	value extrapolated to zero water content										literature values a
283.15	730.848	616.551	683.402	367.228	311.122	272.681	237.576	204.416	184.32	179.207	75.7048
284.15	737.75	621.291	689.111	367.132	312.374	271.788	237.332	204.011	184.906	179.587	75.6742
285.15	742.712	624.786	692.319	369.219	313.365	272.022	237.594	204.225	185.202	179.868	75.6449
286.15	745.3	626.778	695.518	370.155	314.219	272.279	237.888	204.479	185.436	180.092	75.617
287.15	748.068	628.589	698.126	371.919	315.071	272.664	238.157	204.784	185.731	180.324	75.5904
288.15	751.268	630.511	700.777	374.835	315.916	273.047	238.558	205.185	185.998	180.629	75.5651
289.15	754.54	632.137	704.512	377.874	316.987	273.315	238.903	205.467	186.246	180.889	75.541
290.15	758.243	634.349	707.066	380.736	317.905	273.769	239.364	205.84	186.52	181.201	75.5181
291.15	760.004	636.029	710.198	383.323	318.98	274.127	240.745	206.214	186.786	181.41	75.4963
292.15	760.148	637.807	712.951	386.007	320.202	274.584	244.035	206.585	187.136	181.745	75.4758
293.15	762.485	639.704	715.401	388.071	321.042	274.926	245.239	207.073	187.485	182.056	75.4563
294.15	764.965	641.894	717.948	388.917	322.02	275.434	245.821	207.529	187.882	182.372	75.438
295.15	768.129	643.309	719.782	394.986	323.148	275.913	246.413	208.042	188.168	182.764	75.4207
296.15	770.969	644.876	721.101	395.944	324.327	276.529	247.179	208.492	188.591	183.214	75.4044
297.15	774.277	646.877	720.659	399.028	325.7	277.166	248.085	209.151	189.141	183.621	75.3892
298.15	776.721	648.303	722.289	402.086	326.837	278.057	249.047	209.895	189.763	184.153	75.3749
299.15	780.46	650.984	721.414	404.871	328.341	279.172	250.093	210.912	190.639	184.948	75.3616
300.15	785.098	653.93	721.064	408.093	329.726	280.787	249.937	212.189	191.406	185.797	75.3493
301.15	791.174	657.922	718.667	411.119	330.687	282.782	248.955	213.909	192.825	187.142	75.3378
302.15	799.011	663.998	716.202	414.465	331.129	285.82	250.047	216.443	194.967	189.236	75.3273
303.15	809.077	672.394	713.639	418.373	328.906	289.367	253.749	219.325	197.388	191.586	75.3176
a isobaric molar heat capacity obtained from Shomate equation, Chase, M.W., Jr., NIST-JANAF Themochemical Tables, Fourth Edition, J. Phys. Chem. Ref. Data, Monograph 9, 1998, 1-1951.

## Sheet: Table SI_6
Table SI-6. Isobaric molar heat capacity of chol-C11 levulinate as a function of temperature and water content
MH2O (g/mol)		18.015	outlier w(H2O)=0.0816,0.036,0.12698
MIL (g/mol)		385.28
W_H2O	0	0.0306	0.042	0.0816	0.036	0.1042	0.12698	0.1575	0.1867	0.2019	1
x_H2O	0	0.403017	0.483902	0.655197	0.712884	0.75673	0.799924	0.83078	0.845622	0.844001	1
x_IL	1	0.596983	0.516098	0.344803	0.287116	0.24327	0.200076	0.16922	0.154378	0.155999	0
M_avg (g/mol)	385.28	316.817	266.359	183.568	156.537	120.788	108.581	91.496	80.1634	75.308	18.015
T/K	Cpm / J/(K mol)
	value extrapolated to zero water content										literature values a
283.15	755.534	470.966	421.591	315.846	452.497	269.653	247.918	209.059	186.399	180.95	75.7048
284.15	758.347	476.621	423.5	317.169	455.045	270.806	248.837	210.103	187.235	181.616	75.6742
285.15	760.466	480.035	424.23	317.754	456.021	271.354	249.245	210.47	187.575	181.969	75.6449
286.15	762.893	480.152	424.742	318.224	457.257	271.737	249.66	210.84	187.859	182.274	75.617
287.15	764.627	481.221	425.25	318.529	458.11	272.104	250.001	211.105	188.138	182.47	75.5904
288.15	765.975	489.022	425.611	318.935	458.832	272.378	250.299	211.391	188.32	182.695	75.5651
289.15	771.446	488.953	426.252	319.433	460.385	272.807	250.675	211.715	188.65	183.027	75.541
290.15	771.369	488.147	426.894	319.887	460.966	273.255	251.086	212.042	188.951	183.294	75.5181
291.15	773.873	489.098	427.419	320.334	462.153	273.645	251.5	212.353	189.227	183.525	75.4963
292.15	778.15	491.207	428.362	321.112	463.884	274.228	252.02	212.807	189.638	184.017	75.4758
293.15	780.539	492.105	428.491	321.355	464.88	274.416	252.199	212.959	189.833	184.121	75.4563
294.15	784.931	493.189	428.992	321.64	465.642	274.73	252.431	213.198	189.933	184.321	75.438
295.15	786.665	496.862	429.573	322.178	466.883	275.164	252.874	213.541	190.132	184.575	75.4207
296.15	789.516	498.443	430.162	322.583	467.976	275.514	253.178	213.711	190.511	184.663	75.4044
297.15	792.059	499.241	430.591	323.017	469.082	275.82	253.492	213.992	190.766	184.982	75.3892
298.15	795.064	500.891	431.098	323.41	470.13	276.21	253.876	214.33	191.087	185.378	75.3749
299.15	798.146	503.11	431.398	323.812	471.007	276.555	254.164	214.562	191.306	185.587	75.3616
300.15	800.188	503.282	432.047	324.23	472.231	276.918	254.499	214.778	191.534	185.807	75.3493
301.15	803.656	505.1	432.43	324.555	473.563	277.226	254.735	215.095	191.809	186.056	75.3378
302.15	804.888	506.791	432.89	324.98	474.979	277.572	255.055	215.407	192.059	186.306	75.3273
303.15	809.82	505.672	433.361	325.319	476.813	277.943	255.388	215.717	192.307	186.543	75.3176

## Sheet: Table SI_7
Table SI-7. Apparent molar volume of choline lactate as a function of temperature and water content
W_H2O	0	0.02012	0.045	0.10604	0.14444	0.18635	0.24517
m_H2O (kg/mol)	0	0.106257	0.243844	0.613839	0.873655	1.18521	1.68082
x_H2O	0	0.180496	0.335744	0.559931	0.644245	0.710708	0.776986
x_IL	1	0.819504	0.664256	0.440069	0.355755	0.289292	0.223014
M_avg (g/mol)	193.24	161.613	134.409	95.126	80.3522	68.7062	57.0926
t/°C	T/K	V(m,i)φ /cm3/mol
40	313.15	168.982	172.591	167.358	167.779	167.062	165.96
38	311.15	168.787	172.396	167.15	167.564	166.844	165.737
36	309.15	168.596	172.202	166.943	167.35	166.626	165.51
34	307.15	168.406	172.009	166.738	167.136	166.406	165.281
32	305.15	168.216	171.815	166.532	166.92	166.185	165.052
30	303.15	168.027	171.622	166.326	166.704	165.963	164.82
28	301.15	167.837	171.428	166.12	166.487	165.74	164.587
26	299.15	167.647	171.236	165.914	166.27	165.514	164.351
24	297.15	167.458	171.043	165.708	166.05	165.287	164.113
22	295.15	167.268	170.85	165.501	165.831	165.057	163.873
20	293.15	167.078	170.657	165.294	165.611	164.827	163.631
18	291.15	166.887	170.464	165.086	165.39	164.595	163.386
16	289.15	166.696	170.271	164.878	165.167	164.36	163.139
14	287.15	166.506	170.078	164.67	164.944	164.125	162.888

## Sheet: Table SI_8
Table SI-8. Apparent molar volume of choline levulinate as a function of temperature and water content
W_H2O	0	0.13	0.18	0.03	0.045	0.0807	0.013	0.062	0.22
m_H2O (kg/mol)	0	0.681436	1.00106	0.141043	0.214887	0.400329	0.0600658	0.301432	1.28626
x_H2O	0	0.645241	0.727663	0.273497	0.364496	0.516562	0.13817	0.445846	0.774427
x_IL	1	0.354759	0.272337	0.726503	0.635504	0.483438	0.86183	0.554154	0.225573
M_avg (g/mol)	219.28	89.4155	72.8269	164.235	145.92	115.314	191.471	129.547	63.415
t/°C	T/K	V(m,i)φ /cm3/mol
40	313.15	193.646	193.318	195.708	195.849	194.563	196.386	195.287	190.206
38	311.15	193.409	193.079	195.488	195.628	194.339	196.168	195.035	189.973
36	309.15	193.173	192.838	195.269	195.407	194.117	195.952	194.791	189.738
34	307.15	192.937	192.597	195.052	195.187	193.894	195.736	194.551	189.504
32	305.15	192.7	192.354	194.834	194.968	193.672	195.52	194.317	189.268
30	303.15	192.464	192.111	194.617	194.748	193.451	195.303	194.087	189.029
28	301.15	192.227	191.866	194.4	194.529	193.229	195.088	193.858	188.79
26	299.15	191.987	191.62	194.183	194.311	193.007	194.872	193.63	188.55
24	297.15	191.749	191.372	193.966	194.092	192.783	194.656	193.403	188.307
22	295.15	191.51	191.122	193.749	193.873	192.559	194.44	193.175	188.062
20	293.15	191.27	190.87	193.532	193.654	192.335	194.224	192.95	187.816
18	291.15	191.03	190.617	193.314	193.435	192.109	194.008	192.724	187.567
16	289.15	190.789	190.363	193.097	193.216	191.882	193.792	192.496	187.316
14	287.15	190.548	190.107	192.879	192.996	191.655	193.575	192.27	187.062

## Sheet: Table SI_9
Table SI-9. Apparent molar volume of water in choline lactate as a function of temperature and water content
W_H2O	0	0.02012	0.045	0.10604	0.14444	0.18635	0.24517
m_H2O	0	0.0438901	0.243844	0.243844	0.613839	0.873655	1.18521
x_H2O	0	0.180496	0.335744	0.559931	0.644245	0.710708	0.776986
x_IL	1	0.819504	0.664256	0.440069	0.355755	0.289292	0.223014
M_avg	193.24	161.613	134.409	95.126	80.3522	68.7062	57.0926
t/°C	T/K	V(m,i)φ /cm3/mol
40	313.15	17.5146	25.0179	16.7692	17.4142	17.3172	17.2484
38	311.15	17.4909	24.9991	16.7426	17.3879	17.2933	17.2258
36	309.15	17.4816	24.9808	16.7183	17.3625	17.2693	17.2028
34	307.15	17.4737	24.964	16.6946	17.3372	17.2453	17.1794
32	305.15	17.4666	24.9473	16.6708	17.3117	17.221	17.1564
30	303.15	17.3926	24.9006	16.6357	17.2781	17.1908	17.1291
28	301.15	17.3842	24.8836	16.6129	17.2526	17.1666	17.1059
26	299.15	17.3744	24.8683	16.59	17.2271	17.142	17.0828
24	297.15	17.3632	24.8516	16.5669	17.2014	17.1172	17.0596
22	295.15	17.348	24.8346	16.5443	17.1759	17.0922	17.0363
20	293.15	17.3339	24.8179	16.522	17.1505	17.0671	17.0129
18	291.15	17.315	24.8004	16.4994	17.125	17.042	16.9895
16	289.15	17.2919	24.7834	16.4769	17.0994	17.0167	16.966
14	287.15	17.2707	24.7655	16.4548	17.074	16.9914	16.9424

## Sheet: Table SI_10
Table SI-10. Apparent molar volume of water in choline levulinate as a function of temperature and water content
W_H2O	0	0.13	0.18	0.03	0.045	0.0807	0.013	0.062	0.22
m_H2O (kg/mol)	0	0.681436	1.00106	0.141043	0.214887	0.400329	0.0600658	0.301432	1.28626
x_H2O	0	0.645241	0.727663	0.273497	0.364496	0.516562	0.13817	0.445846	0.774427
x_IL	1	0.354759	0.272337	0.726503	0.635504	0.483438	0.86183	0.554154	0.225573
M_avg (g/mol)	219.28	89.4155	72.8269	164.235	145.92	115.314	191.471	129.547	63.415
t/°C	T/K	V(m,i)φ /cm3/mol
40	313.15	16.4582	16.8777	15.4312	16.6123	16.1239	15.9855	16.358	16.2547
38	311.15	16.4499	16.8668	15.4866	16.6435	16.1315	16.1518	16.3373	16.245
36	309.15	16.4232	16.8426	15.4535	16.6137	16.1083	16.1047	16.2834	16.2251
34	307.15	16.4064	16.8253	15.4703	16.6161	16.1013	16.1681	16.2561	16.2107
32	305.15	16.3894	16.8077	15.4827	16.6186	16.094	16.2271	16.2361	16.1963
30	303.15	16.3633	16.7838	15.4519	16.5895	16.0721	16.1734	16.1992	16.1766
28	301.15	16.347	16.7663	15.4675	16.5916	16.066	16.2314	16.1851	16.1623
26	299.15	16.3199	16.7422	15.435	16.5649	16.0432	16.1779	16.1513	16.1432
24	297.15	16.304	16.7245	15.4485	16.5672	16.0357	16.2295	16.1401	16.1289
22	295.15	16.2874	16.7066	15.4614	16.569	16.028	16.2764	16.129	16.1146
20	293.15	16.2616	16.6821	15.4275	16.541	16.0042	16.2157	16.0982	16.0953
18	291.15	16.2457	16.6641	15.4387	16.5424	15.9954	16.2579	16.0886	16.0809
16	289.15	16.2205	16.6401	15.4029	16.5142	15.9698	16.1899	16.0564	16.0617
14	287.15	16.2053	16.6222	15.4121	16.5151	15.9609	16.2261	16.0469	16.0473

[truncated: 9 more sheets: Table SI_11, Table SI_12 , Table SI_13, Table SI_14, Table SI_15, Table SI_16, Table SI_17, Table SI_18, Table SI_19]
